# Supplementary material for: Entangled Pd complexes over Fe3O4@SiO2 as supported catalysts for hydrogenation and Suzuki reactions
Source: Royal Society of Chemistry journal article supplement (doi:10.1039/c3cy00646h), 2013-12-17
Supplement: c3cy00646h.pdf [file c3cy00646h.pdf]

**Entangled Pd complexes over  $\text{Fe}_3\text{O}_4@\text{SiO}_2$  as supported catalysts  
for hydrogenation and Suzuki reactions**

Peng Wang, Hengzhi Liu, Jianrui Niu, Rong Li\* and Jiantai Ma\*

*College of Chemistry and Chemical Engineering, Lanzhou University, Lanzhou 730000, P. R. China, Fax: +86*

*931 8912311, Tel.: +86 931 8912311, E-mail: majiantai@lzu.edu.cn*

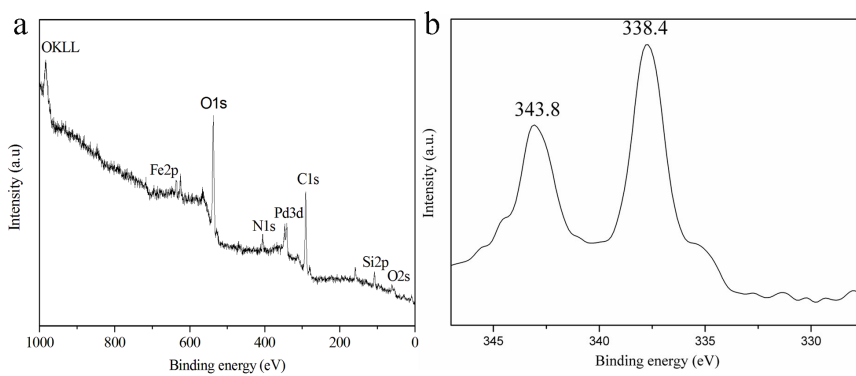

**Fig. S1** XPS spectrum of the elemental survey scan of XL-Pd(II)-Fe<sub>3</sub>O<sub>4</sub>@SiO<sub>2</sub>

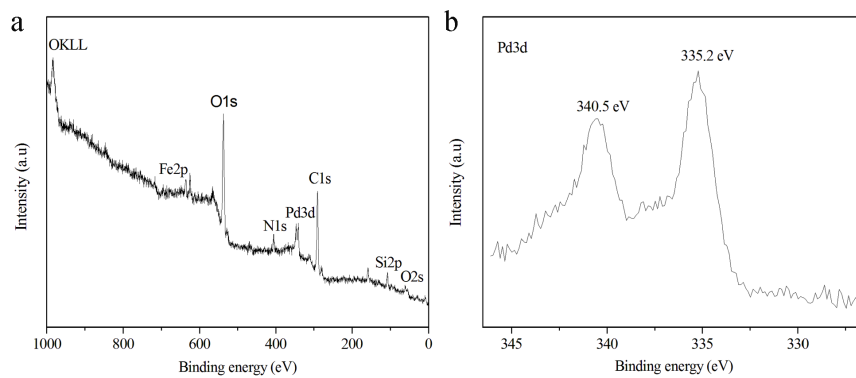

**Fig. S2** XPS spectrum of the elemental survey scan of XL-Pd(0)-Fe<sub>3</sub>O<sub>4</sub>@SiO<sub>2</sub>

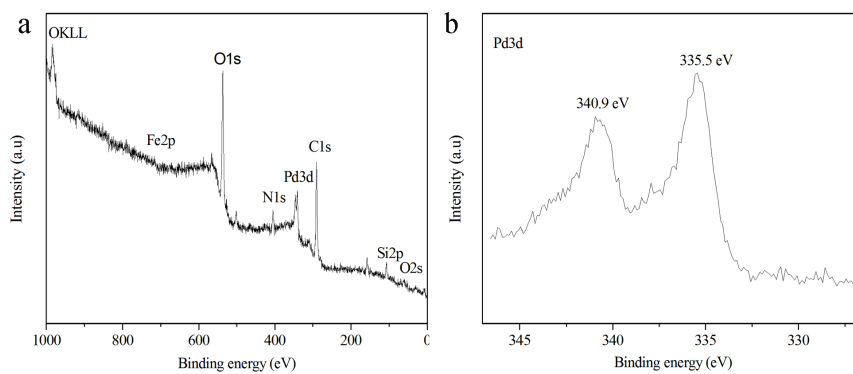

**Fig. S3** XPS spectrum of the elemental survey scan of XL-Pd(0)-Fe<sub>3</sub>O<sub>4</sub>@SiO<sub>2</sub> after 5 times.

1. Biphenyl. 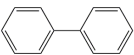  $^1\text{H NMR}$  ( $\text{CDCl}_3$ , 400 MHz,  $25^\circ\text{C}$ )  
 $\delta$  7.34 (t, 2H,  $^3J_{\text{HH}}=7.2$  Hz), 7.44 (t, 4H,  $^3J_{\text{HH}}=7.6$  Hz), 7.59 (d, 4H,  $^2J_{\text{HH}}=4.0$  Hz)
2. 4-methyl-biphenyl.   $^1\text{H NMR}$  ( $\text{CDCl}_3$ , 400 MHz,  $25^\circ\text{C}$ )  
 $\delta$  2.37 (s, 3H,  $\text{CH}_3$ ), 7.23 (d, 2H,  $^2J_{\text{HH}}=4.0$  Hz), 7.30 (t, 1H,  $^3J_{\text{HH}}=7.2$  Hz), 7.41 (t, 2H,  $^3J_{\text{HH}}=7.6$  Hz), 7.47 (t, 2H,  $^3J_{\text{HH}}=9.6$  Hz), 7.56 (d, 2H,  $^2J_{\text{HH}}=4.0$  Hz)
3. 4-Nitro-biphenyl.   $^1\text{H NMR}$  ( $(\text{CD}_3)_2\text{SO}$ , 400 MHz,  $25^\circ\text{C}$ )  
 $\delta$  6.85 (d, 1H,  $^2J_{\text{HH}}=8.8$  Hz), 7.27 (t, 2H,  $^3J_{\text{HH}}=7.6$  Hz), 7.40 (t, 2H,  $^3J_{\text{HH}}=7.8$  Hz), 7.48 (d, 2H,  $^2J_{\text{HH}}=8.4$  Hz), 7.56 (d, 2H,  $^2J_{\text{HH}}=7.6$  Hz)
4. 4-Methoxy-biphenyl.   $^1\text{H NMR}$  ( $\text{CDCl}_3$ , 400 MHz,  $25^\circ\text{C}$ )  
 $\delta$  3.85 (s, 3H,  $\text{OCH}_3$ ), 6.98 (d, 2H,  $^2J_{\text{HH}}=4.4$  Hz), 7.30 (t, 1H,  $^3J_{\text{HH}}=7.2$  Hz), 7.41 (t, 2H,  $^3J_{\text{HH}}=7.6$  Hz), 7.54 (t, 4H,  $^3J_{\text{HH}}=7.6$  Hz)
5. 1-biphenyl-4-yl-ethanone.   $^1\text{H NMR}$  ( $\text{CDCl}_3$ , 400 MHz,  $25^\circ\text{C}$ )  
 $\delta$  2.642 (s, 3H,  $\text{CH}_3$ ), 7.40 (t, 1H,  $^3J_{\text{HH}}=7.2$  Hz), 7.48 (t, 2H,  $^3J_{\text{HH}}=7.6$  Hz), 7.63 (d, 2H,  $^2J_{\text{HH}}=3.6$  Hz), 7.69 (d, 2H,  $^2J_{\text{HH}}=4.0$  Hz), 8.04 (d, 2H,  $^2J_{\text{HH}}=4.0$  Hz)
6. Aniline   $^1\text{H NMR}$  ( $\text{CDCl}_3$ , 400 MHz,  $25^\circ\text{C}$ )  
 $\delta$  3.59 (s, 2H), 6.66 (d, 2H,  $J=8.4$  Hz), 6.75 (q, 1H,  $J=7.6$  Hz), 7.13 (m, 2H)
7. P-toluidine   $^1\text{H NMR}$  ( $\text{CDCl}_3$ , 400 MHz,  $25^\circ\text{C}$ )  
 $\delta$  2.50 (m, 3H), 4.76 (s, 2H), 6.48 (m, 2H), 6.82 (d,  $J=4.0$  Hz).
8. O-anisidine   $^1\text{H NMR}$  ( $\text{CDCl}_3$ , 400 MHz,  $25^\circ\text{C}$ )  
 $\delta$  3.75 (s, 2H), 3.81 (s, 3H), 6.08 (m, 2H), 6.78 (m, 2H)
9. Bromoaniline   $^1\text{H NMR}$  ( $\text{CDCl}_3$ , 400 MHz,  $25^\circ\text{C}$ )  
 $\delta$  3.65 (s, 2H), 6.56 (d, 2H,  $J=7.2$  Hz), 7.24 (m, 2H)
10. Naphthylamine   $^1\text{H NMR}$  ( $\text{CDCl}_3$ , 400 MHz,  $25^\circ\text{C}$ )  
 $\delta$  5.71 (s, 2H), 6.69 (m, 1H), 7.08 (d, 2H,  $J=4$  Hz), 7.21 (q, 1H,  $J=8$  Hz), 7.34 (d, 1H,  $J=0.8$  Hz), 7.38~7.42 (m, 2H), 7.72 (d, 1H,  $J=4$  Hz), 8.08 (d, 1H,  $J=4$  Hz)

11. Ethylbenzene   $^1\text{H}$  NMR ( $\text{CDCl}_3$ , 400 MHz, 25 °C)  
 $\delta$  1.23 (m, 3H), 2.64 (m, 2H), 7.17 (m, 3H), 7.28 (m, 2H)
